# Supplementary material for: Characterization of pathogenic bacteria using ionic liquid via single drop microextraction combined with MALDI-TOF MS
Source: Royal Society of Chemistry journal article supplement (doi:10.1039/c1an15350a), 2011-01-01
Supplement: c1an15350a.pdf [file c1an15350a.pdf]

## **Characterization of pathogenic bacteria using ionic liquid via single drop microextraction combined with MALDI-TOF MS**

Faheem Ahmad,<sup>a,b</sup> and Hui-Fen Wu<sup>a,b,c\*</sup>

<sup>a</sup>Department of Chemistry, National Sun Yat-Sen University, Kaohsiung 80424, Taiwan,

<sup>b</sup>Center for Nanoscience and Nanotechnology, National Sun Yat-Sen University, Kaohsiung 80424, Taiwan

<sup>c</sup>Doctoral Degree Program in Marine Biotechnology, National Sun Yat-Sen University, Kaohsiung, 80424, Taiwan

\*Corresponding author, Phone: +886-7-5252000-3955; Fax: +886-7-5253908  
E-mail: [hwu@faculty.nsysu.edu.tw](mailto:hwu@faculty.nsysu.edu.tw)

**Supporting information:**

## Figure captions of supporting information.

- Fig. S1** The MALDI-TOF MS spectra of *E. coli* as direct analysis at  $\sim 10^6$  cfu/ml (a), and  $\sim 10^7$  cfu/ml (b). The mass spectra were obtained without SDME.
- Fig. S2** The MALDI-TOF MS spectra of *Serratia marcescens* as direct analysis at  $\sim 10^6$  cfu/ml (a), and  $\sim 10^7$  cfu/ml (b). The mass spectra were obtained without SDME.
- Fig. S3** MALDI-TOF MS spectra of the mixture of both bacteria viz., *E. coli* and *S. marcescens* obtained after SDME from spiked selective concentrate aqueous sample in a 1.5 mL glass vial. The ionic liquid was used as organic drop (a), platinum nanoparticles in ionic liquid (b). Prior to SDME, an aliquot of the bacteria was adjusted with sterilized distilled water to approximately  $\sim 10^7$  cfu/mL and mixed with equal ratio in glass vial.
- Fig. S4** MALDI-TOF MS spectra of the mixture of both bacteria viz., *E. coli* and *S. marcescens* obtained after SDME from spiked selective concentrate aqueous sample in a 1.5 mL glass vial. The ionic liquid was used as organic drop (a), platinum nanoparticles in ionic liquid (b). Prior to SDME, an aliquot of the bacteria was adjusted with sterilized distilled water to approximately  $\sim 10^6$  cfu/mL and mixed with equal ratio in glass vial.

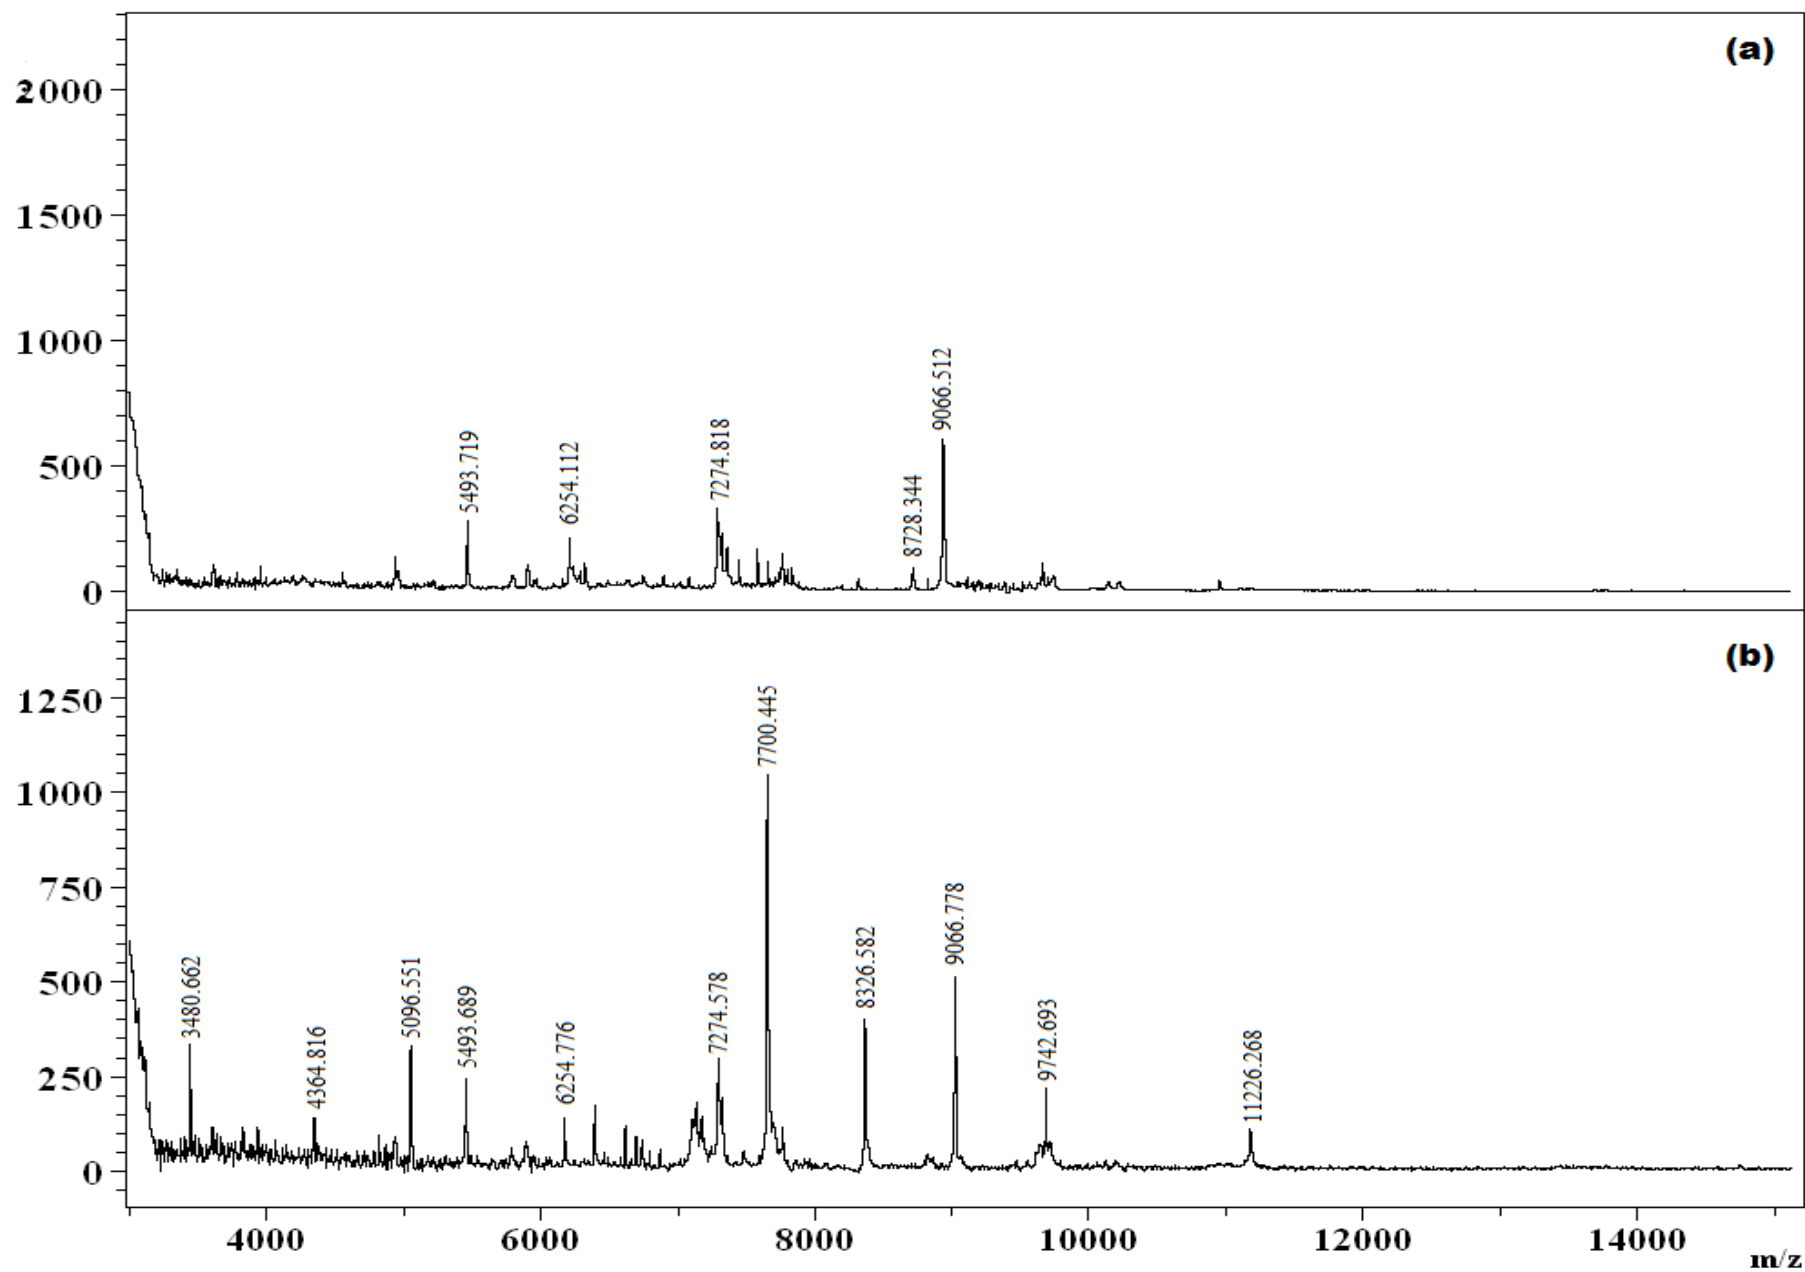

**Fig. 1**

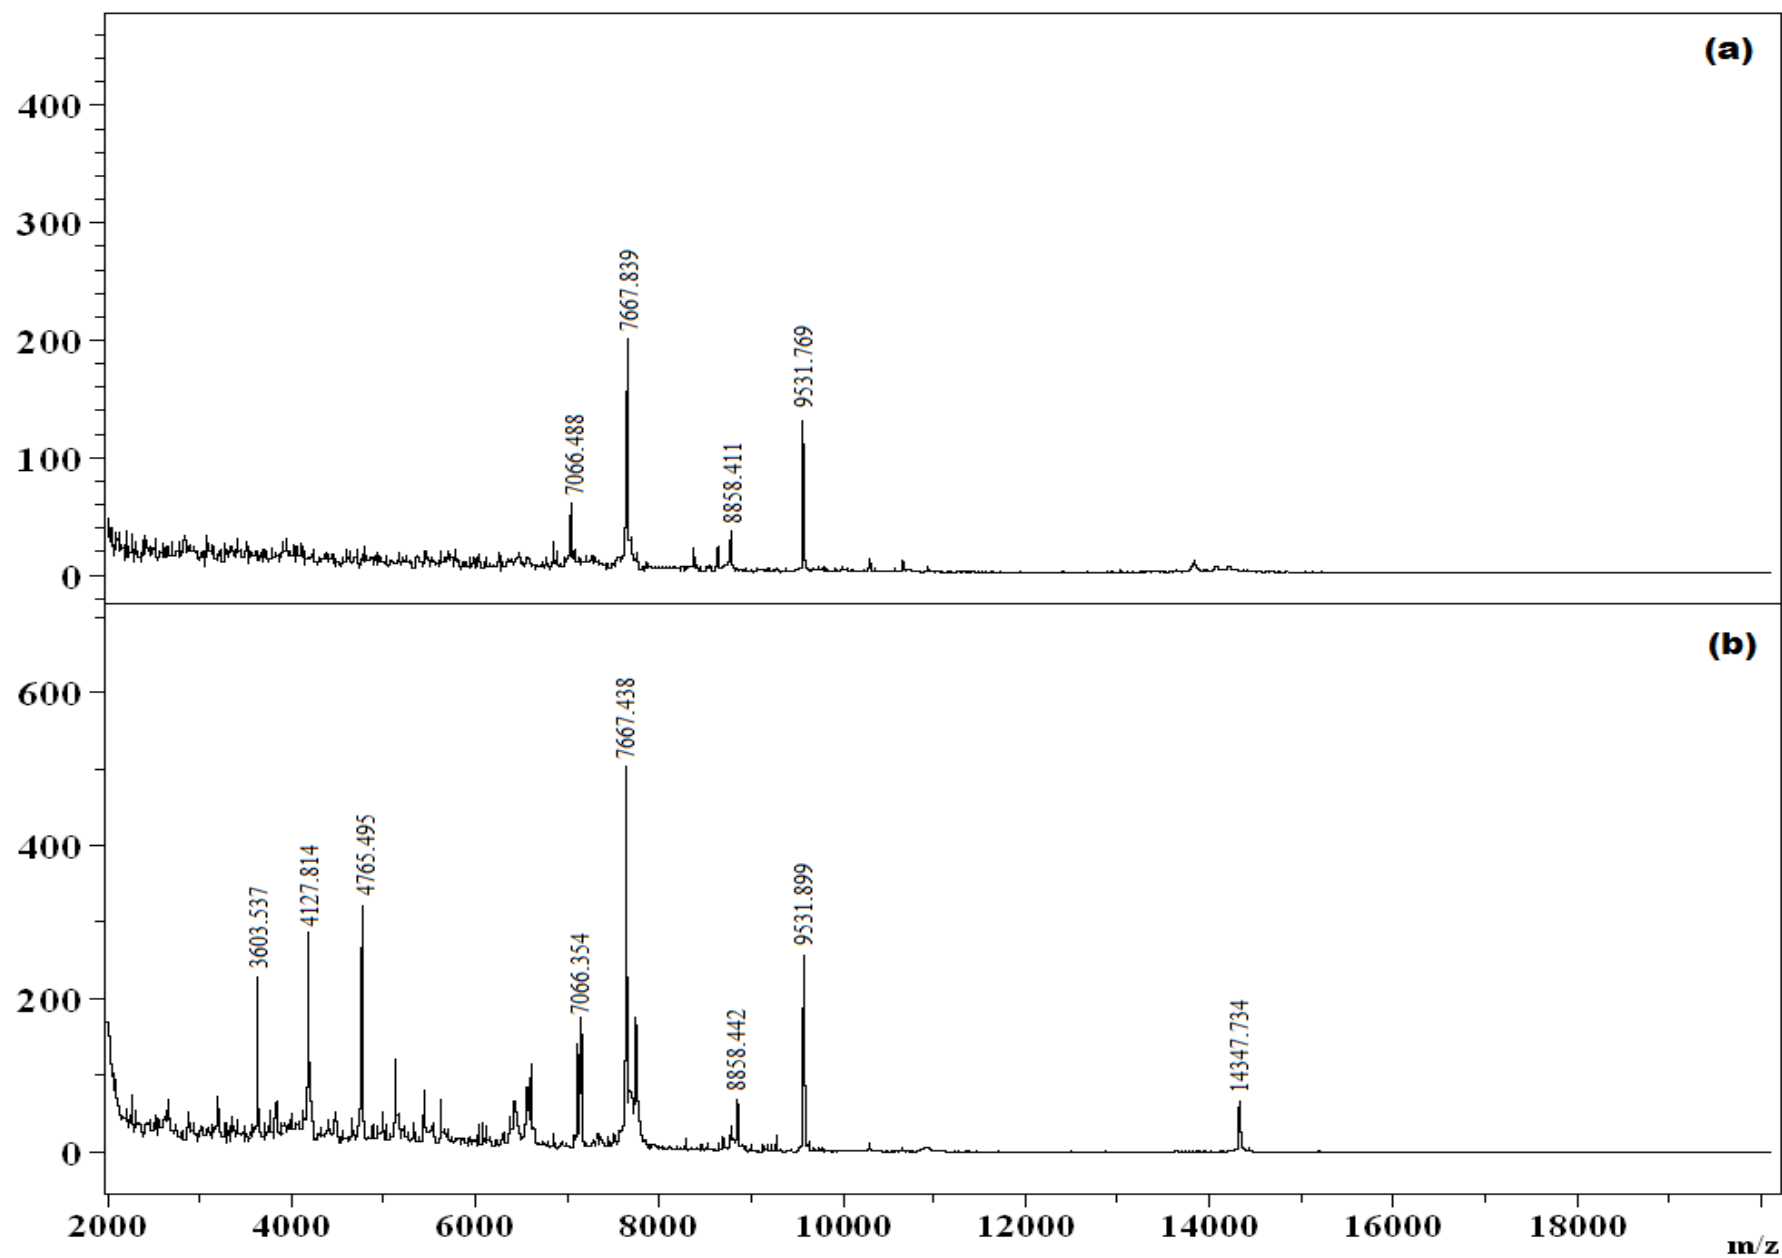

**Fig. 2**

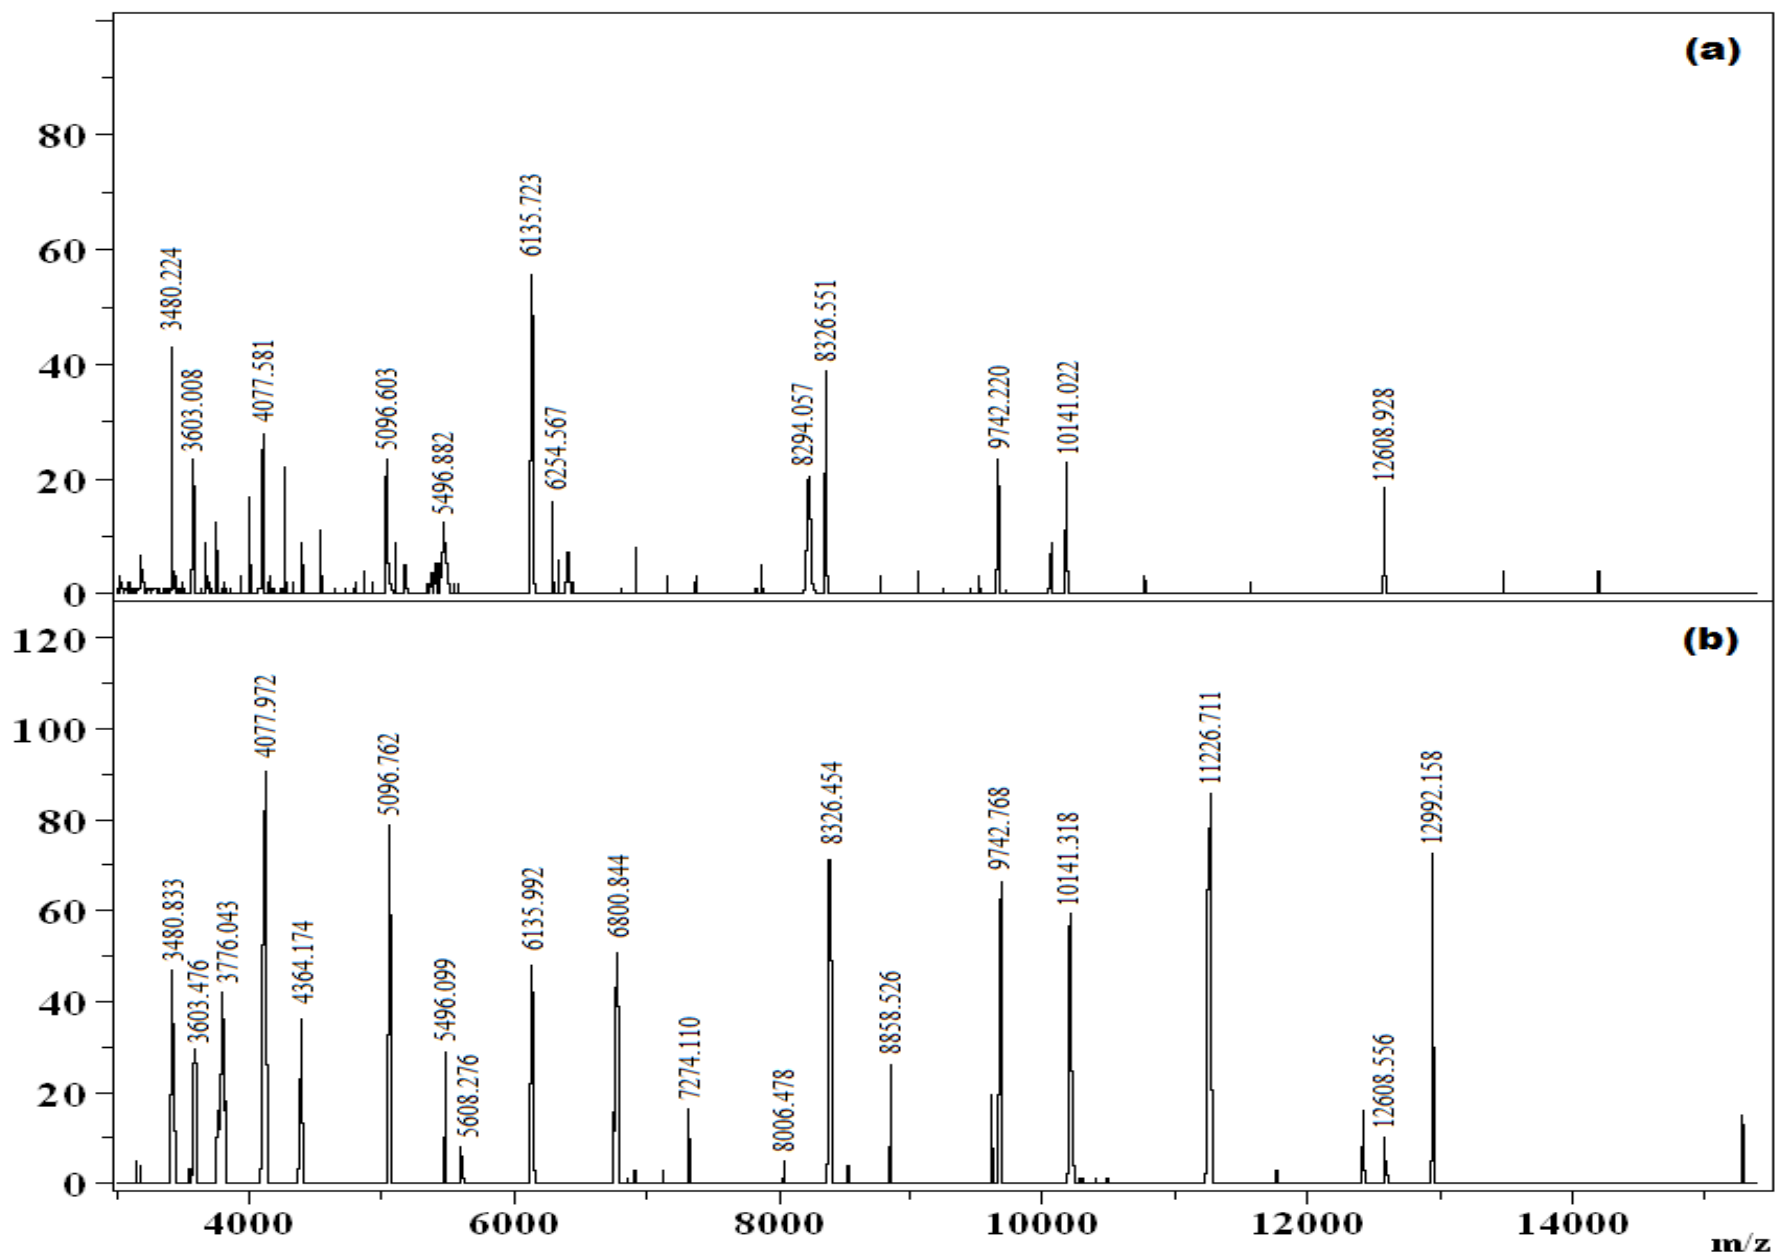

**Fig. 3**

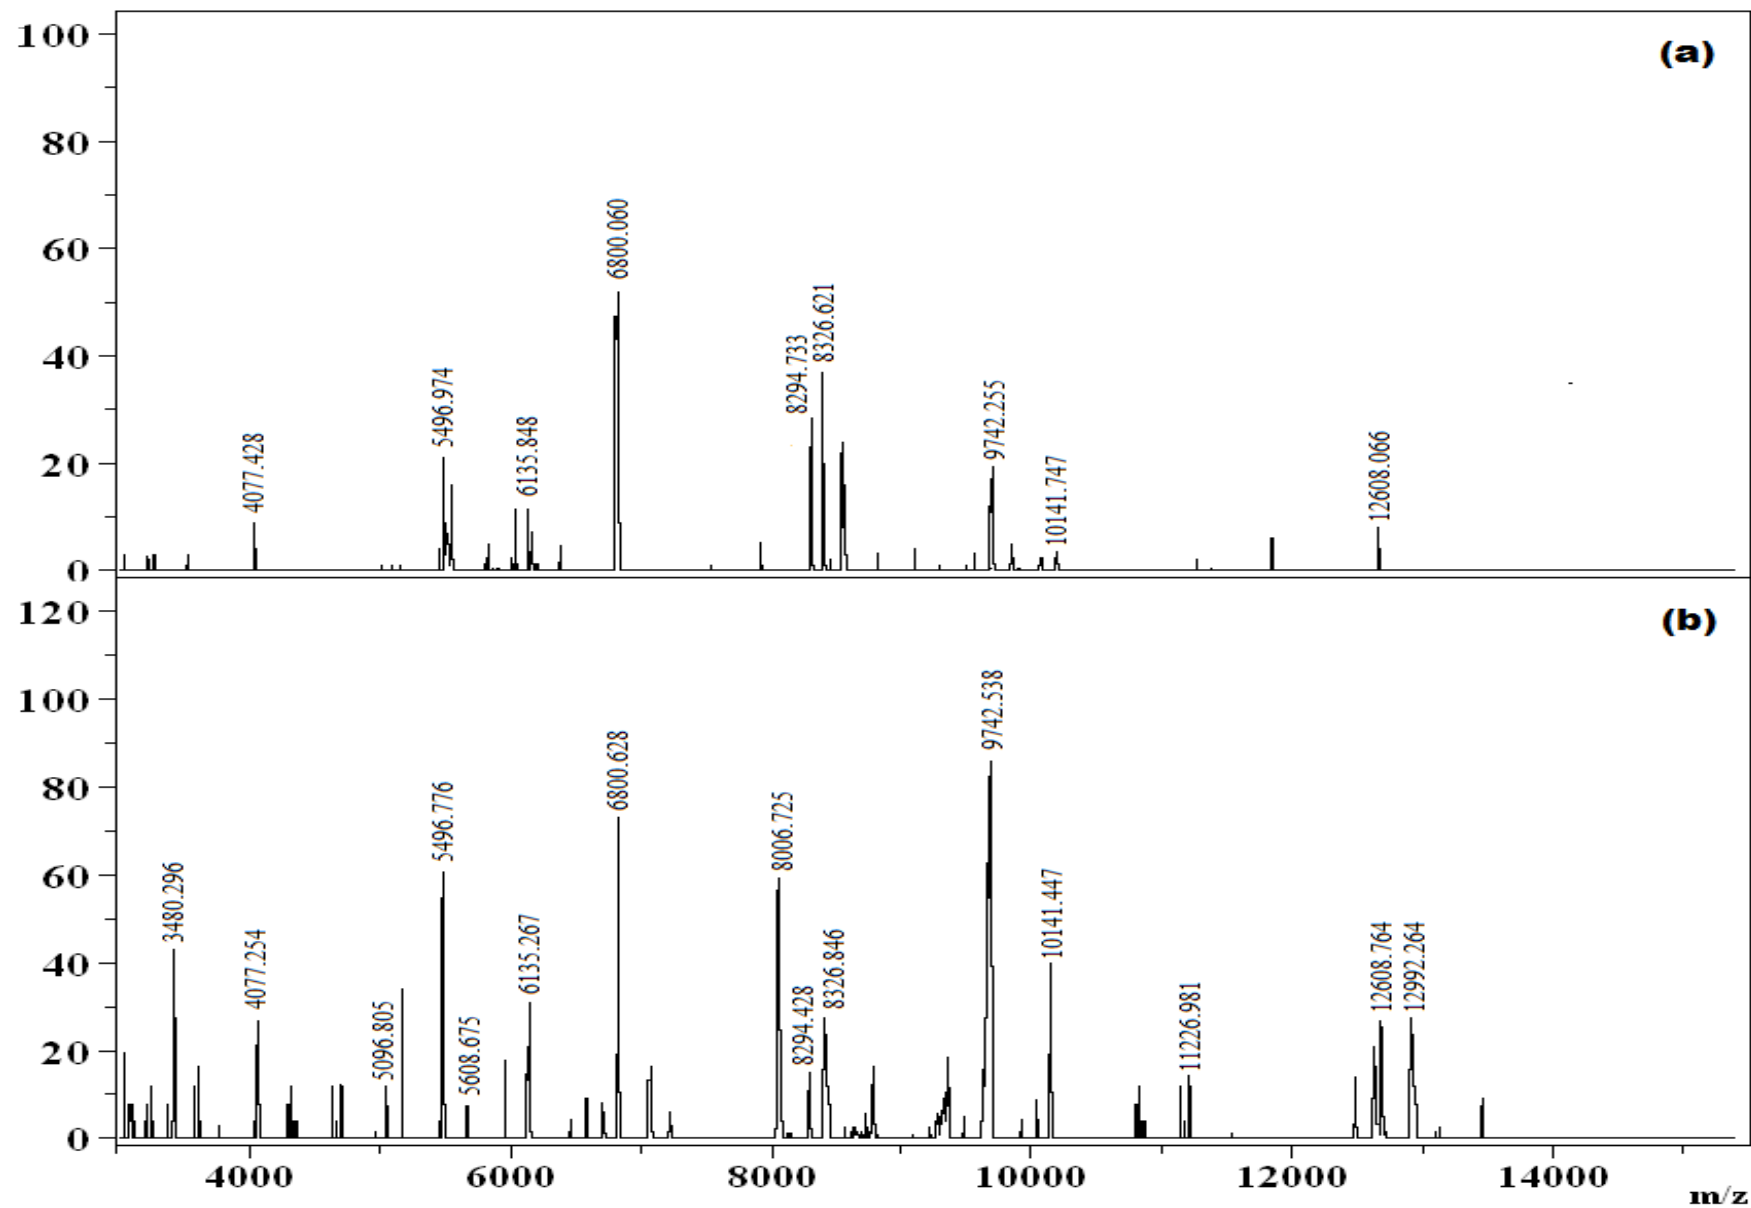

**Fig. 4**
